# Supplementary material for: The Formative Development of the Sleep GOALS (Goal-focused Online Access to Lifestyle Support) Intervention for Postpartum Individuals: A qualitative study
Source: Research Square preprint supplement (doi:10.21203/rs.3.rs-8041369/v1), 2025-11-23
Supplement: Supplementary file 1 [file 046da73df892d4b0aea9b409.docx]

# Appendix I - COREQ Checklist Completion Table

| COREQ Item | Addressed in Manuscript (Yes/No) | Page Number(s) |
| --- | --- | --- |
| Interviewer/facilitator | Yes | p. 10 |
| Credentials | Yes | p. 10 |
| Occupation | Yes | p. 10 |
| Gender | Yes | p. 10 |
| Experience and training | Yes | p. 10 |
| Relationship established | Yes | p. 10 |
| Participant knowledge of the interviewer | No | N/A |
| Interviewer characteristics | Yes | p. 10 |
| Methodological orientation and theory | Yes | p. 7 |
| Sampling | Yes | p. 7, 8 |
| Method of approach | Yes | p. 7 |
| Sample size | Yes | p. 11 |
| Non-participation | Yes | p. 7 |
| Setting of data collection | Yes | p. 8 |
| Presence of non-participants | No | N/A |
| Description of sample | Yes | p. 11 |
| Interview guide | Yes | p. 8-10 |
| Repeat interviews | Yes | p. 7 |
| Audio/visual recording | Yes | p. 10 |
| Field notes | No | N/A |
| Duration | Yes | p. 10 |
| Data saturation | Yes | p. 10 |
| Transcripts returned | No | N/A |
| Number of data coders | Yes | p. 10 |
| Description of the coding tree | No | N/A |
| Derivation of themes | Yes | p. 9 |
| Software | Yes | p. 10 |
| Participant checking | No | N/A |
| Quotations presented | Yes | p. 12–18 |
| Data and findings consistent | Yes | p. 11–18 |
| Clarity of major themes | Yes | p. 12–18 |
| Clarity of minor themes | No | N/A |
