# Supplementary material for: The Formative Development of the Sleep GOALS (Goal-focused Online Access to Lifestyle Support) Intervention for Postpartum Individuals: A qualitative study
Source: Research Square preprint supplement (doi:10.21203/rs.3.rs-8041369/v1), 2025-11-23
Supplement: Supplementary file 2 [file 9c4e9acdcf1a57d9c587ee13.docx]

**Interview Guide**

**Welcome and Overview**

Hi, my name is [name], and I am a research assistant on the study. Our long-term goal is to adapt weight loss interventions that are possible for birthing people with young children. We invited you to take part in this interview) because a researcher interviewed postpartum birthing people about their experiences with sleep, diet, and physical activity giving birth. We sent you all a newsletter that summarized the consistent themes or stories that appeared from the 21 people we interviewed. This interview) is a follow-up session to get your thoughts on the results summarized in the newsletter. We also sent you a survey to get your thoughts on what information is important to include in an intervention and how difficult it would be to make changes to your sleep, diet, and physical activity after childbirth. We will talk about the results of the survey and discuss how we can make sure the intervention includes information you feel is important and possible.

**Ground Rules**

1. You are the expert on your experience and life. There are no right or wrong answers to any of the questions I will ask you today.
2. If *you* have any questions at any point in the interview, please stop me and ask.
3. In addition, if a question makes you feel uncomfortable or anxious, feel free to skip it.
4. This is a safe space for you to share your thoughts with me, and you will be the one in control of this conversation.
5. This interview will last 30 to 60 minutes).
6. Your confidentiality in this study is important to me. I will be recording our conversation and then making a transcript of the recording. Your name and identifying information will not be associated with the recording in any way. Once transcription is finished, the recording will be destroyed.
7. To analyze the interview, we will upload the audio files to a secure online transcription service called TranscribeMe. TranscribeMe will type up your words and mine as we hear them on the audio file. We will then use the typed up or transcribed interviews for analysis.
8. Please let me know if you cannot hear me and I will do the same with you. Sometimes our voices may not get picked up and we want to ensure we can both hear each other clearly.

**Role of the Interviewer**

1. My role in this interview is to ask questions and to mostly listen. This is a qualitative research interview, and I am here to learn from you.
2. I will not be participating in the conversation much, but I will be guiding it by asking questions and moving the discussion from one topic to another.
3. Do you have any final questions before we begin?
4. If you agree to be recorded, please talk as clearly and as loudly as I am speaking. Do you have any questions?

**Permission to record**

Is it okay if I start the recording?

Sample Questions: These sample questions are meant to be a guide, not a script. The purpose of the interview is to let the participants direct and lead the discussion. We may use prompts if necessary to gain clarity of participant answers.

Part 1: Review interview results (see attached newsletter)

1. What are your first reactions to the newsletter?
   1. Does the information presented accurately portray the issues postpartum people experience after childbirth?
   2. What did we miss in the newsletter?
      1. Anything surprise you (what’s mentioned or what’s not mentioned)?

Part 2: Discuss the important health behavior information to include in an intervention and the difficulty of making behavior change.

Next, we will review the answers to the pre-focus group survey (see attached). This part of the focus group will depend on the answers to the survey. The discussion will focus on items participants score as most important and most difficult.

(for new participants) Next we are going to complete a brief survey together about the importance of including and the difficulty of implementing a list of items in an intervention to help postpartum people. Either:

- I am going to send you a link in chat for you to complete. I ask that you type the number (insert) so we can link our discussion to your answers. To remind you, your name will not be associated with any of your responses.
- I am going to read the survey verbatim to you. Each question will ask you to rank it by how important or how difficult it is. I will share the list of what I will be asking you so you can more easily follow along.

(after survey) Great, now we are going to further discuss your responses and how others have been responding.

1. From the survey responses we’ve gotten so far, (insert) has been found to be most important. What are your thoughts about that?
   1. What do you consider most important?
   2. Why do you think this is important?
2. Least important
   1. What do you consider least important?
   2. Why?
3. (insert) Most difficult to implement. What are your thoughts?
   1. What do you consider most difficult?
4. (insert) Least difficult to implement. What are your thoughts?
   1. What do you consider least difficult?
5. If the intervention could only focus on three things, what should those three things be? Why?
6. What is missing, if anything?
7. Any else you feel we should know?
