# Supplementary material for: The Formative Development of the Sleep GOALS (Goal-focused Online Access to Lifestyle Support) Intervention for Postpartum Individuals: A qualitative study
Source: Research Square preprint supplement (doi:10.21203/rs.3.rs-8041369/v1), 2025-11-23
Supplement: Supplementary file 3 [file ddef52f4cd6f11e168fee65b.docx]

Pre-focus group survey: Importance/Difficult

We plan to develop a weight loss intervention that addresses sleep, diet, and physical activity for women and birthing people with young children. We would like to get your thoughts about potential intervention content. Specifically, we would like to know what content you believe is important to include in the intervention. We would also like to know how difficult you believe it would be to make changes in your sleep, diet, and physical activity behaviors. Please complete this survey before the planned focus group. We will use your responses to help guide the focus group discussion.

**Part 1**: How important is it that the intervention includes the following content?

1. Strategies to help your child sleep through the night

| 1 | 2 | 3 | 4 | 5 |
| --- | --- | --- | --- | --- |
| Not at all importance | Slightly Important | Moderately Important | Very Important | Extremely Important |

1. Strategies to help you establish a sleep routine for yourself

| 1 | 2 | 3 | 4 | 5 |
| --- | --- | --- | --- | --- |
| Not at all importance | Slightly Important | Moderately Important | Very Important | Extremely Important |

1. Learn ways to improve sleep efficiency (getting more uninterrupted sleep)?

| 1 | 2 | 3 | 4 | 5 |
| --- | --- | --- | --- | --- |
| Not at all importance | Slightly Important | Moderately Important | Very Important | Extremely Important |

1. Learn ways to reduce time in bed

| 1 | 2 | 3 | 4 | 5 |
| --- | --- | --- | --- | --- |
| Not at all importance | Slightly Important | Moderately Important | Very Important | Extremely Important |

1. Learn ways to reduce sleep-related worry (e.g., setting more realistic expectations for yourself)

| 1 | 2 | 3 | 4 | 5 |
| --- | --- | --- | --- | --- |
| Not at all importance | Slightly Important | Moderately Important | Very Important | Extremely Important |

1. Learn ways to sleep in complicated (e.g., noisy bed partner, too hot or cold temperature, streetlights) environments

| 1 | 2 | 3 | 4 | 5 |
| --- | --- | --- | --- | --- |
| Not at all importance | Slightly Important | Moderately Important | Very Important | Extremely Important |

1. Learn strategies for reducing nightmares

| 1 | 2 | 3 | 4 | 5 |
| --- | --- | --- | --- | --- |
| Not at all importance | Slightly Important | Moderately Important | Very Important | Extremely Important |

1. Provide tips for selecting an earlier or later bedtime

| 1 | 2 | 3 | 4 | 5 |
| --- | --- | --- | --- | --- |
| Not at all importance | Slightly Important | Moderately Important | Very Important | Extremely Important |

1. Discuss the ways that sleep can affect diet

| 1 | 2 | 3 | 4 | 5 |
| --- | --- | --- | --- | --- |
| Not at all importance | Slightly Important | Moderately Important | Very Important | Extremely Important |

1. Discuss the ways diet can affect sleep

| 1 | 2 | 3 | 4 | 5 |
| --- | --- | --- | --- | --- |
| Not at all importance | Slightly Important | Moderately Important | Very Important | Extremely Important |

1. Discuss the ways sleep and affect physical activity

| 1 | 2 | 3 | 4 | 5 |
| --- | --- | --- | --- | --- |
| Not at all importance | Slightly Important | Moderately Important | Very Important | Extremely Important |

1. Discuss the way physical activity can affect sleep

| 1 | 2 | 3 | 4 | 5 |
| --- | --- | --- | --- | --- |
| Not at all importance | Slightly Important | Moderately Important | Very Important | Extremely Important |

1. Discuss how sleep can affect weight loss efforts

| 1 | 2 | 3 | 4 | 5 |
| --- | --- | --- | --- | --- |
| Not at all importance | Slightly Important | Moderately Important | Very Important | Extremely Important |

1. What additional information should the intervention include?

**Part 2**: Rate how difficult you believe it would be to make the following changes:

1. Helping your child sleep through the night

| 1 | 2 | 3 | 4 | 5 |
| --- | --- | --- | --- | --- |
| Not at all difficult | Slightly difficult | Moderately difficult | Very difficult | Extremely difficult |

1. Helping you establish a sleep routine for yourself

| 1 | 2 | 3 | 4 | 5 |
| --- | --- | --- | --- | --- |
| Not at all difficult | Slightly difficult | Moderately difficult | Very difficult | Extremely difficult |

1. Improving your sleep efficiency (getting more uninterrupted sleep)?

| 1 | 2 | 3 | 4 | 5 |
| --- | --- | --- | --- | --- |
| Not at all difficult | Slightly difficult | Moderately difficult | Very difficult | Extremely difficult |

1. Reduce your time in bed when you are not asleep

| 1 | 2 | 3 | 4 | 5 |
| --- | --- | --- | --- | --- |
| Not at all difficult | Slightly difficult | Moderately difficult | Very difficult | Extremely difficult |

1. Reduce sleep-related worry (e.g., concerns over not getting enough sleep or how poor sleep affects your day)

| 1 | 2 | 3 | 4 | 5 |
| --- | --- | --- | --- | --- |
| Not at all difficult | Slightly difficult | Moderately difficult | Very difficult | Extremely difficult |

1. Sleep better in complicated environments (e.g., noisy bed partner, too hot or cold temperature, streetlights)

| 1 | 2 | 3 | 4 | 5 |
| --- | --- | --- | --- | --- |
| Not at all difficult | Slightly difficult | Moderately difficult | Very difficult | Extremely difficult |

1. Reduce nightmares

| 1 | 2 | 3 | 4 | 5 |
| --- | --- | --- | --- | --- |
| Not at all difficult | Slightly difficult | Moderately difficult | Very difficult | Extremely difficult |

1. Select an earlier or later bedtime

| 1 | 2 | 3 | 4 | 5 |
| --- | --- | --- | --- | --- |
| Not at all difficult | Slightly difficult | Moderately difficult | Very difficult | Extremely difficult |

1. Improve your sleep to help you eat better

| 1 | 2 | 3 | 4 | 5 |
| --- | --- | --- | --- | --- |
| Not at all difficult | Slightly difficult | Moderately difficult | Very difficult | Extremely difficult |

1. Improve your diet to help you sleep better

| 1 | 2 | 3 | 4 | 5 |
| --- | --- | --- | --- | --- |
| Not at all difficult | Slightly difficult | Moderately difficult | Very difficult | Extremely difficult |

1. Improve your sleep to help you become more physical activity

| 1 | 2 | 3 | 4 | 5 |
| --- | --- | --- | --- | --- |
| Not at all difficult | Slightly difficult | Moderately difficult | Very difficult | Extremely difficult |

1. Improve your physical activity to help you sleep better

| 1 | 2 | 3 | 4 | 5 |
| --- | --- | --- | --- | --- |
| Not at all difficult | Slightly difficult | Moderately difficult | Very difficult | Extremely difficult |

1. Lose weight by making changes to your sleep

| 1 | 2 | 3 | 4 | 5 |
| --- | --- | --- | --- | --- |
| Not at all difficult | Slightly difficult | Moderately difficult | Very difficult | Extremely difficult |
